# Supplementary material
Source: PubMed Central journal article supplement (PMC4304004)
Supplement: NIHMS61733-supplement-Supplemental_file_1_of_2.pdf [file NIHMS61733-supplement-Supplemental_file_1_of_2.pdf]

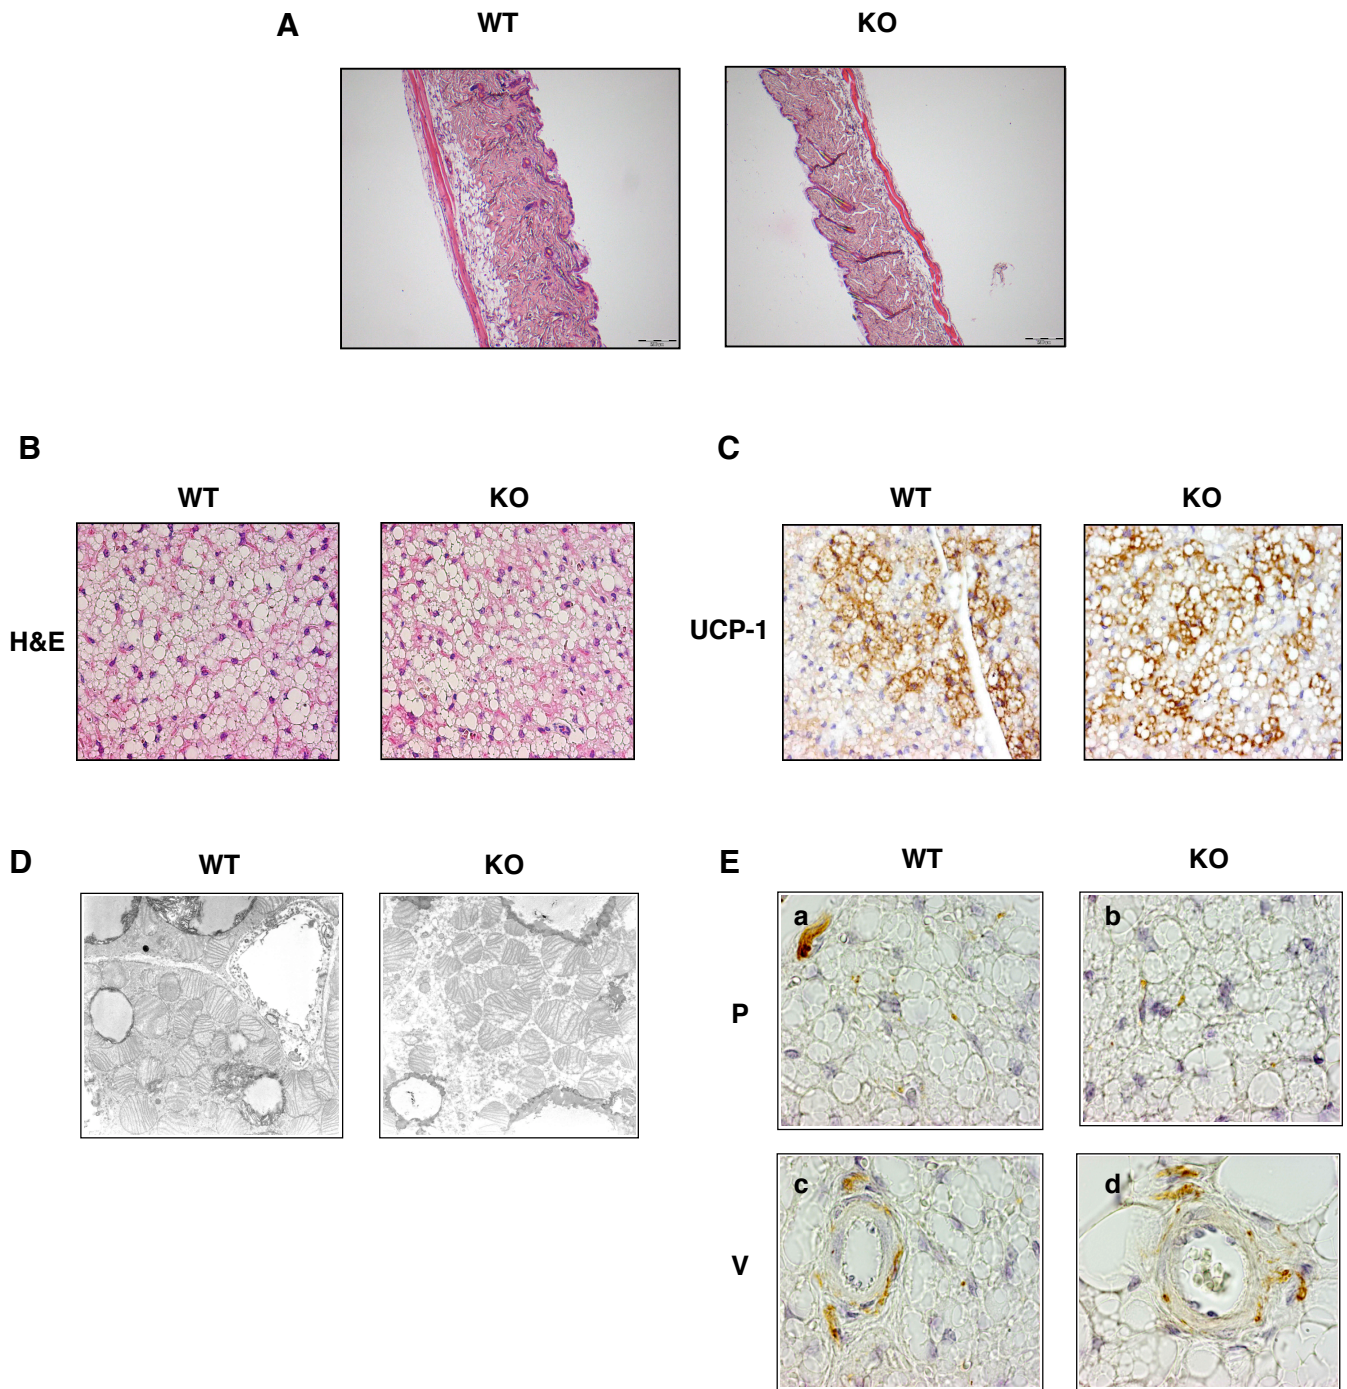

**A.** Morphological analysis of H&E-stained sections of skin from 16-wk-old males wild-type and PPAR $\gamma$ 2 KO mice (n=9). **B.** Morphological analysis of H&E-stained sections of BAT from 16-wk-old wild type and PPAR $\gamma$ 2 KO mice. **C.** Immunohistochemical analysis of UCP-1 in BAT from 16-wk-old wild type and PPAR $\gamma$ 2 KO mice. **D.** Electron microscopy of BAT from 16-wk-old wild-type and PPAR $\gamma$ 2 KO mice. **E.** Immunohistochemical analysis of tyrosine hydroxylase from parenchymal (P) (a,b) and vascular (V) (c,d) noradrenergic nerve fibers in BAT from wild-type and PPAR $\gamma$ 2 KO mice.

**A. Histogram of the distribution of peaks (lipid compounds) according to up-/down-regulation.**

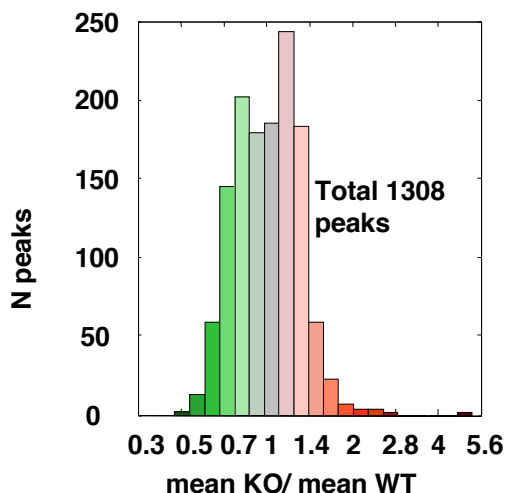

**B. Down-regulated long-chain triacylglycerol cluster**

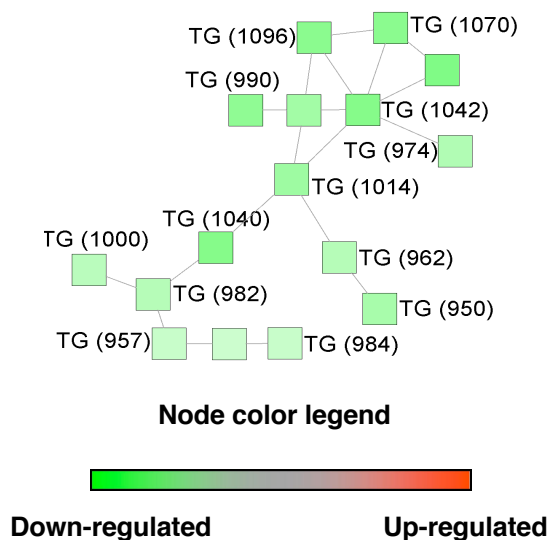

**C. Up-regulated lipids (mainly long chain phospholipids, short-chain triacylglycerols, and diacylglycerols)**

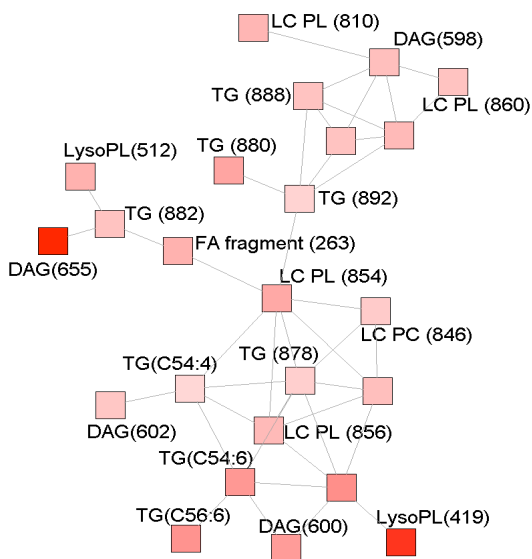

**D. Downregulated cluster containing three C32 phosphatidylcholine lipids**

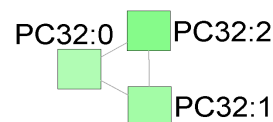

**E. Upregulated ceramide cluster**

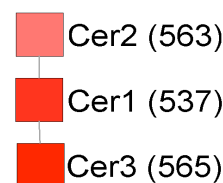

**Selected correlation networks from lipidomic analyses in WAT.** The edges represent linear correlations between compound profiles across different mouse samples that are above a threshold level ( $C > 0.90$ ). The node colors represent the level of up- or down-regulation of PPAR $\gamma$ 2 KO vs. wild type mice. **A.** Histogram showing the distribution of up-/down-regulated processed peaks from LC/MS spectrometry corresponding to lipid compounds. Height of each bar corresponds to number of peaks within a particular range of ratios of means (KO vs. WT). This histogram shows an approximately similar number of peaks up-regulated ( $> 1$ ) and down-regulated ( $< 1$ ) indicating qualitative differences in their composition as indicated by differences in the height of specific LC/MS peaks. **B.** Cluster of long-chain triacylglycerols (TG) is decreased in adipose tissue of PPAR $\gamma$ 2 KO. Nominal m/z value is shown in parentheses. **C.** Other up-regulated lipids in adipose tissue of PPAR $\gamma$ 2 KO mouse, mainly short-chain triacylglycerols (TG), long-chain phospholipids (LC PL), lysophospholipids (LysoPL), and diacylglycerols (DAG). In parentheses are given either nominal m/z value or the fatty acid chain carbon distribution. **D.** Cluster of phosphatidylcholines (C32:n), likely containing combinations of palmitic and palmitoleic acids as fatty acid components. **E.** Cluster containing three ceramide-related compounds. For all three compounds, MS/MS analysis resulted in 264m/z peak characteristic of ceramides.
